# Supplementary material for: A microwave assisted one pot synthesis of novel ammonium based dicationic ionic liquids
Source: Royal Society of Chemistry journal article supplement (doi:10.1039/c4ra16251j), 2015-01-01
Supplement: c4ra16251j1.pdf [file c4ra16251j1.pdf]

## Electronic supplementary information

### A microwave assisted one pot synthesis of novel ammonium based dicationic ionic liquids

Darshak R. Bhatt<sup>1</sup>, Kalpana C. Maheria<sup>1</sup>, Jigisha K. Parikh<sup>2,\*</sup>

<sup>1</sup>Applied Chemistry Department, <sup>2</sup>Chemical Engineering Department,

Sardar Vallabhbhai National Institute of Technology, Surat-395007, Gujarat, India

\*Corresponding author: Phone: 91-261-2201689, Fax: 91-261-2201642,

Email: [jk\\_parikh@yahoo.co.in](mailto:jk_parikh@yahoo.co.in), [jkp@ched.svnit.ac.in](mailto:jkp@ched.svnit.ac.in).

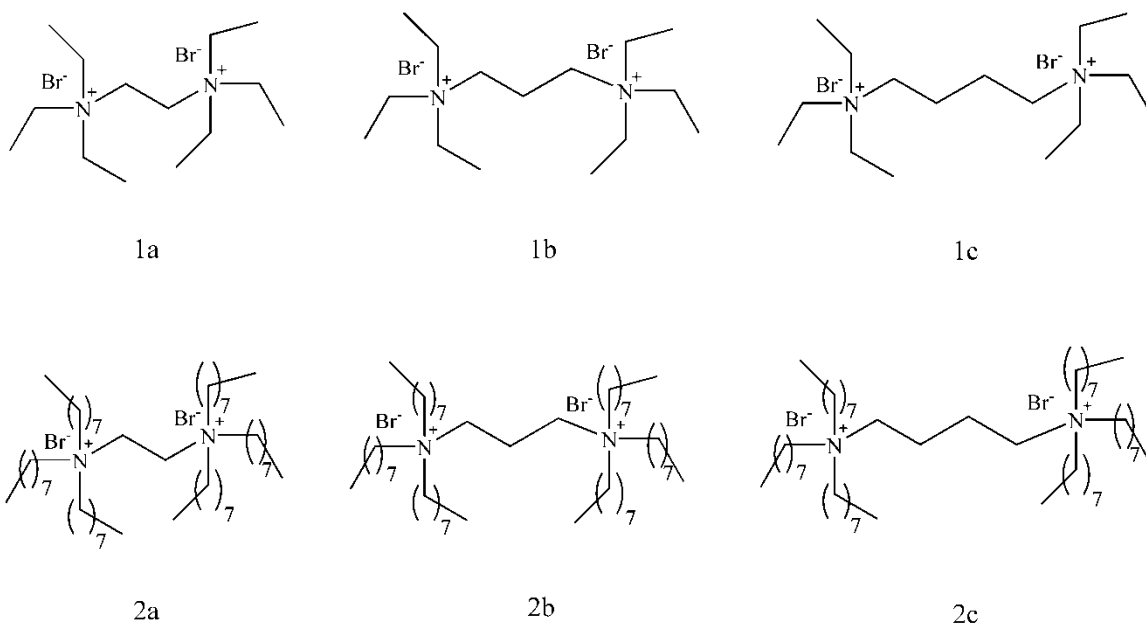

**Fig. s1** Structure of Synthesized DILs.

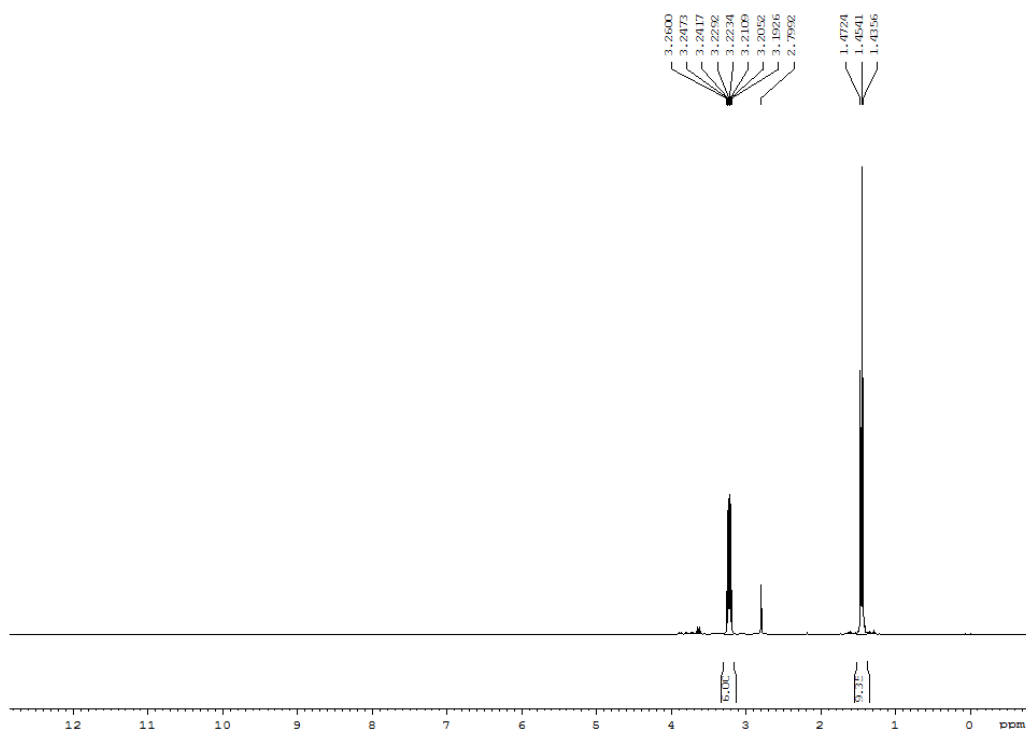

**Fig. s2**  $^1\text{H}$  NMR spectra of DIL1a.

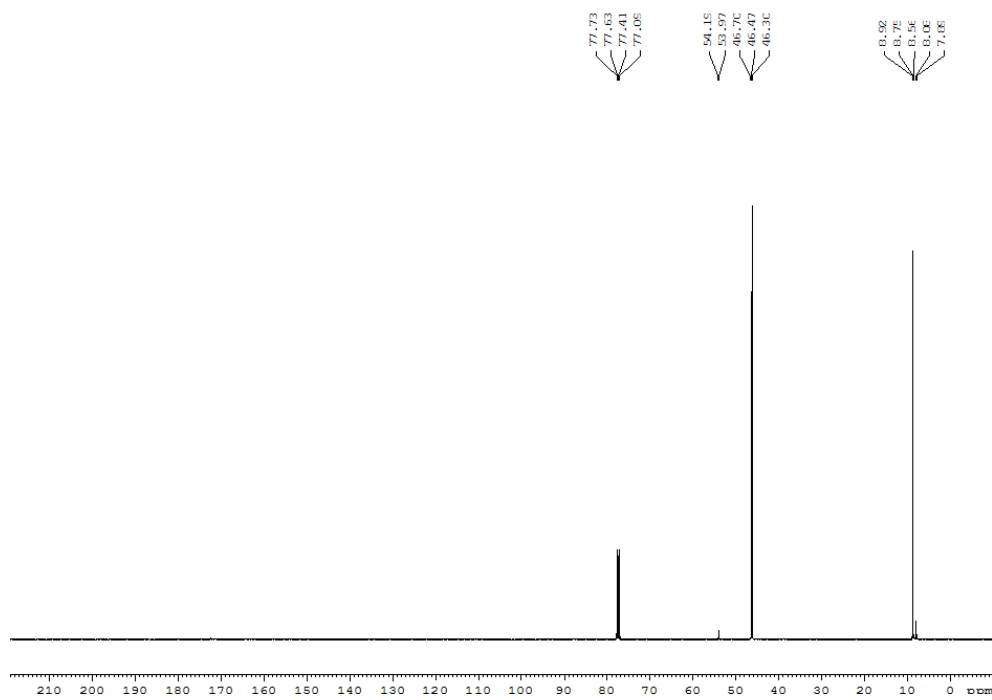

**Fig. s3**  $^{13}\text{C}$  NMR spectra of DIL1a.

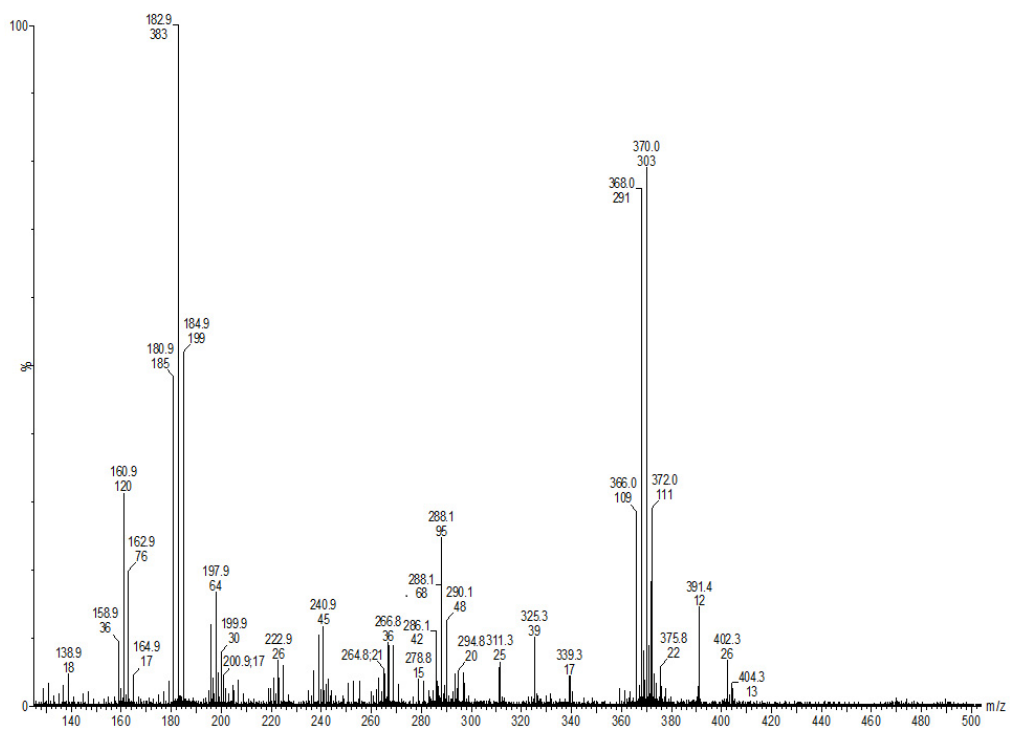

Fig. s4 Mass spectrum of DIL1a.

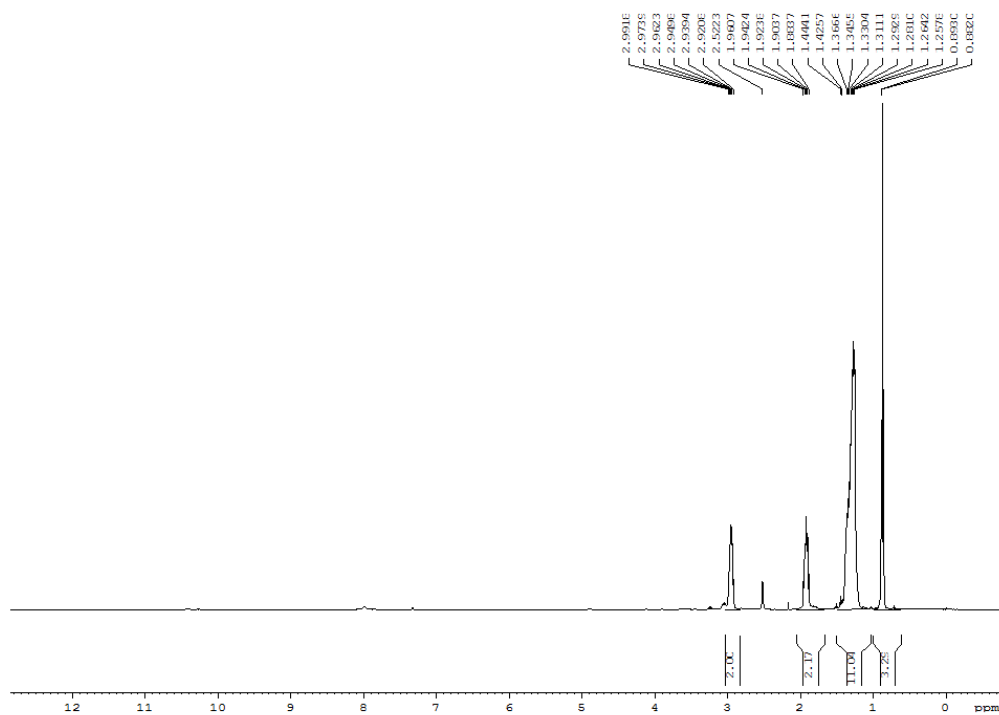

Fig. s5 <sup>1</sup>H NMR spectra of DIL2a.

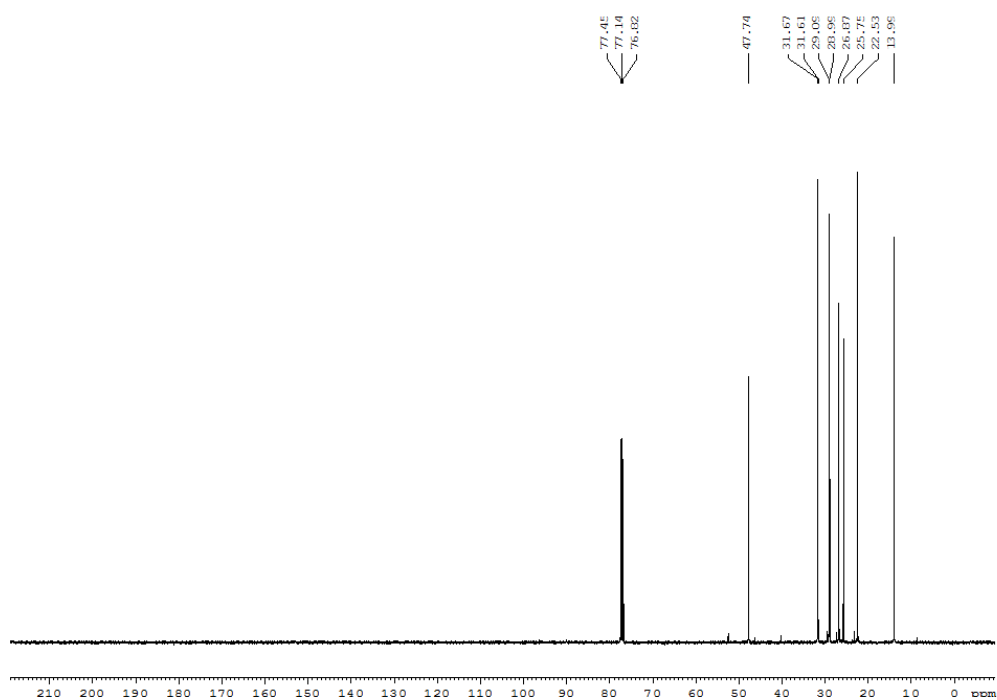

Fig. s6 <sup>13</sup>C NMR spectra of DIL2a.

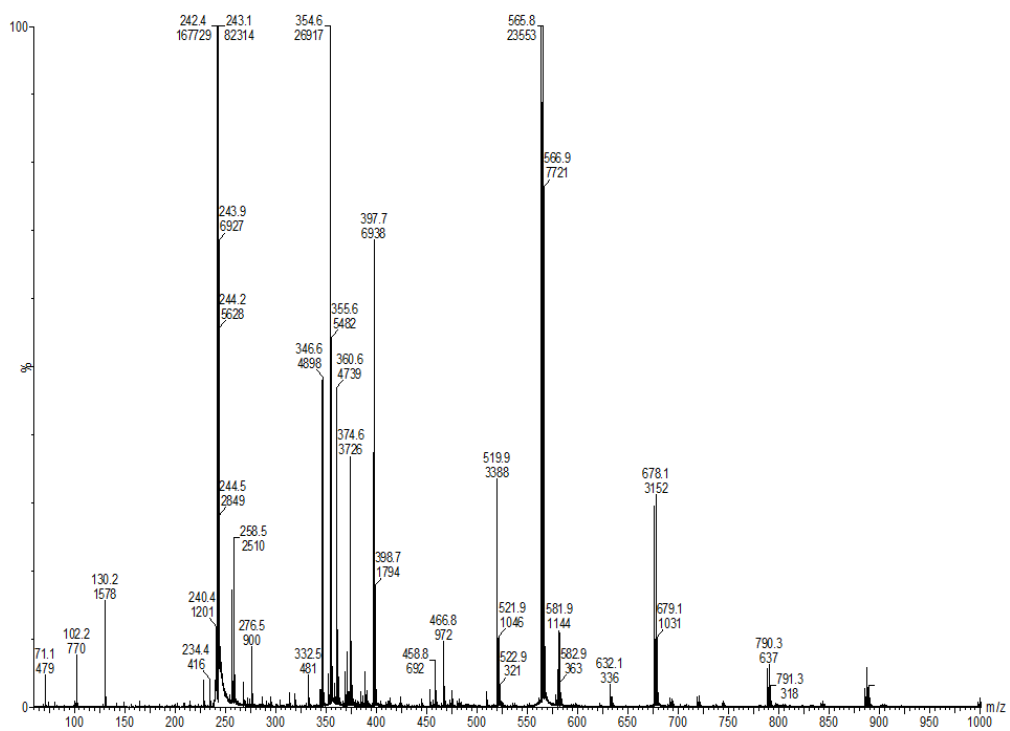

Fig. s7 Mass spectrum of DIL2a.

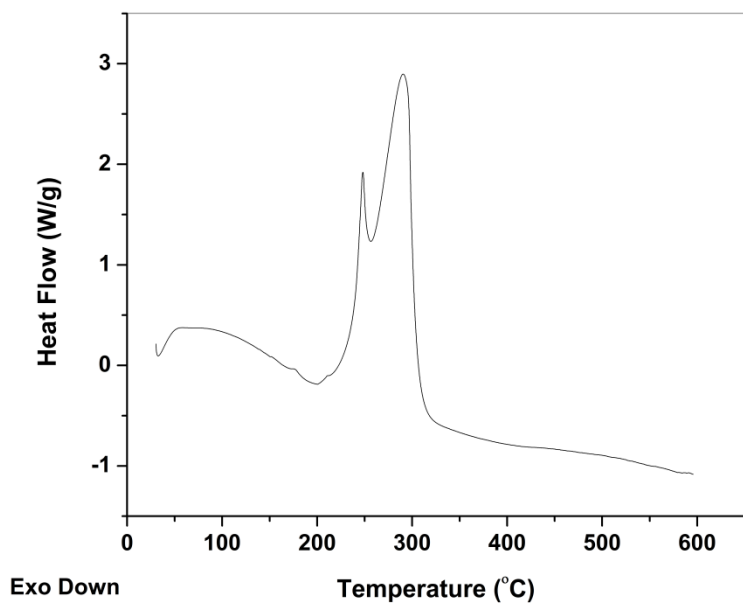

Fig. s8 DSC curve of DIL1a.

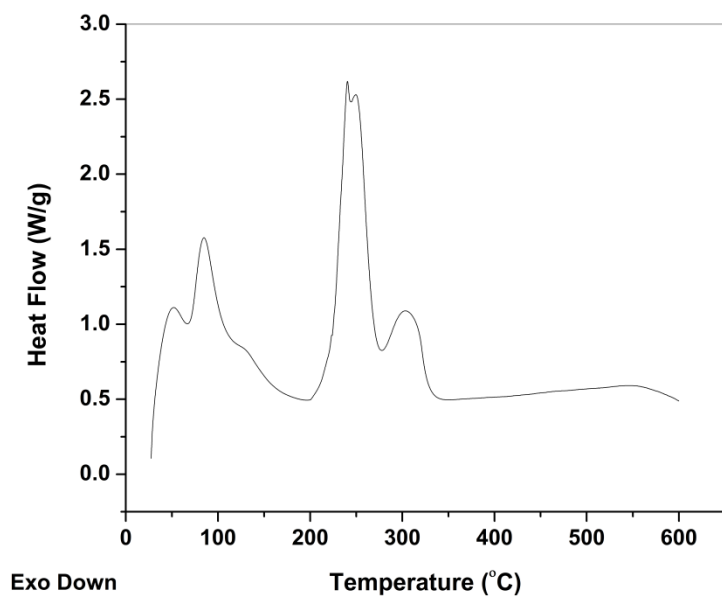

Fig. s9 DSC curve of DIL1b.

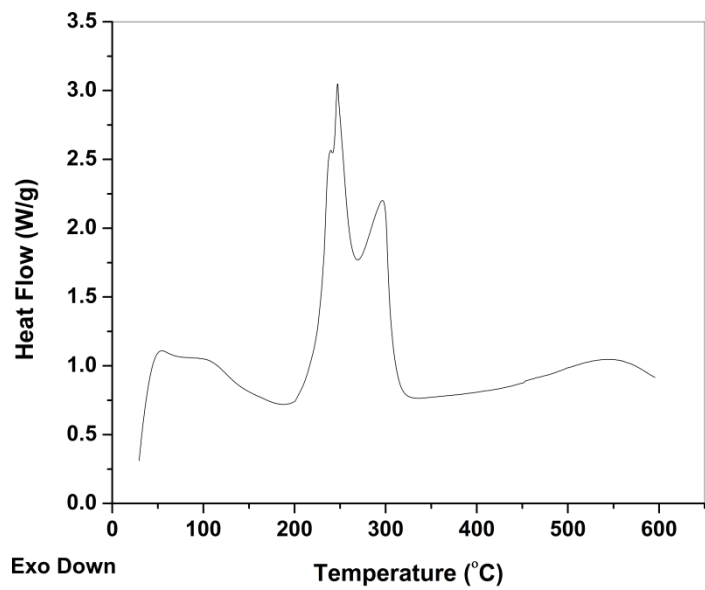

Fig. s10 DSC curve of DIL1c.

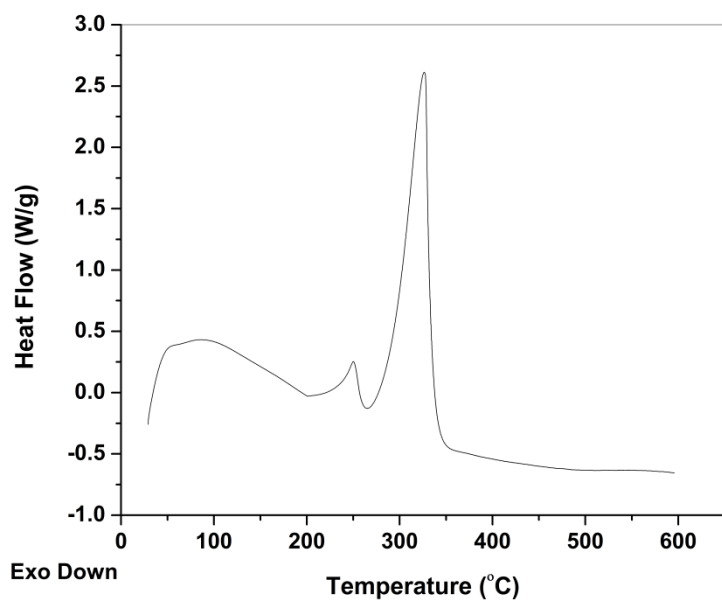

Fig. s11 DSC curve of DIL2a.

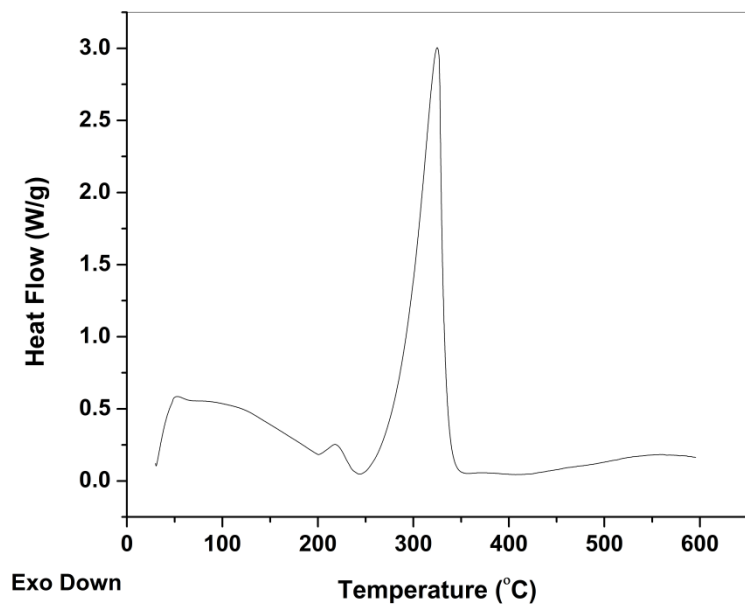

Fig. s12 DSC curve of DIL 2b.

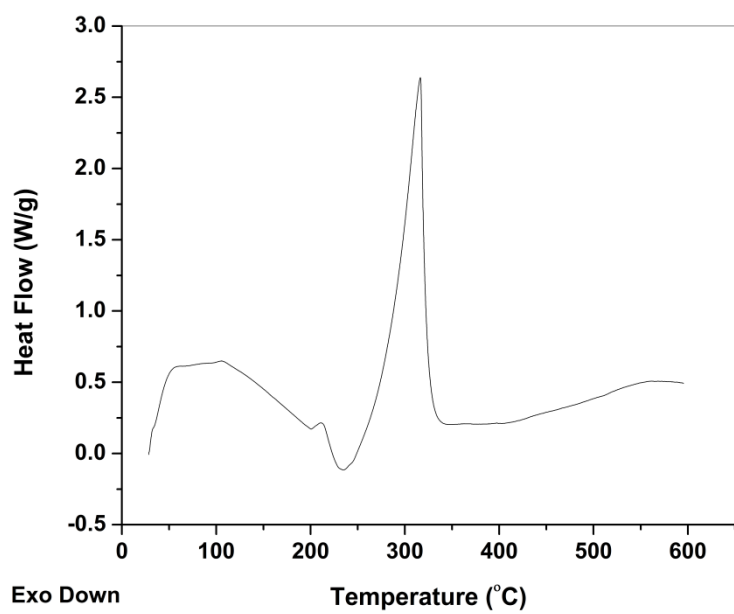

Fig. s13 DSC curve of DIL 2c.
